# Supplementary material for: Integrating gastrocnemius force-length properties,in vivoactivation, and operating lengths reveals howAnolisdeal with ecological challenges
Source: Oxford University Press journal article supplement (doi:10.1242/jeb.151795), 2016-01-01
Supplement: jeb151795supp.pdf [file jeb151795supp.pdf]

Table S1. Hind limb muscle and tendon morphology for *Anolis equestris*.

|                               | Variable                              | Individual |         |         |         |         |         |         |
|-------------------------------|---------------------------------------|------------|---------|---------|---------|---------|---------|---------|
|                               |                                       | 1          | 2       | 3       | 4       | 5       | 6       | 7       |
| External morphology           | Body mass                             | 63.92      | 60.33   | 78.32   | 74.58   | 40.35   | 52.89   | 39.12   |
|                               | SVL                                   | 15.1       | 15      | 16.1    | 15      | 12.5    | 14.1    | 12.3    |
|                               | Total length                          | 39         | 37.7    | 46.1    | 29.5    | 28.5    | 38.4    | 34.6    |
|                               | Humerus length                        | 2.5        | 2.5     | 2.5     | 2.1     | 2.4     | 2.7     | 2.1     |
|                               | Radius length                         | 2.3        | 2       | 2.5     | 2.1     | 2       | 2.1     | 1.7     |
|                               | Metacarpal length                     | 0.9        | 0.9     | 1       | 0.8     | 0.6     | 0.6     | 0.6     |
|                               | 3rd finger length                     | 1          | 1       | 1       | 0.9     | 0.8     | 1       | 0.9     |
|                               | Femur length                          | 3.5        | 3       | 3.3     | 2.8     | 2.7     | 2.6     | 2.6     |
|                               | Tibia length                          | 3.1        | 2.9     | 3.4     | 2.8     | 2.9     | 2.9     | 2.5     |
|                               | Metatarsal length                     | 1.9        | 2       | 2.1     | 1.7     | 1.5     | 1.8     | 1.3     |
| 4th toe length                | 1.8                                   | 1.9        | 2.1     | 1.9     | 1.5     | 1.7     | 1.4     |         |
| Puboischiotibialis            | Fascicle length                       | 3.3        | 3.8     | 3.1     | 3.7     | 3.3     | 3.4     | 2.8     |
|                               | Tendon length                         | 0.2        | 0.2     | 0.5     | 0.4     | 0.2     | 0.5     | 0.4     |
|                               | Tendon mass for length=0.2cm          | 0.0018     | 0.0029  | 0.0028  | 0.001   | 0.001   | 0.0013  | 0.0018  |
|                               | Insertion on tibia (cm from knee)     | 0.3-0.7    | 0.4-0.8 | 0.5-0.9 | 0.3-0.6 | 0.5-0.8 | 0.4-0.8 | 0.3-0.6 |
|                               | Origin on pelvic girdle (cm from hip) | 0.5        | 0.7     | 0.4     | 0.6     | 0.6     | 0.6     | 0.4     |
| Mass                          | 0.3058                                | 0.3096     | 0.5094  | 0.404   | 0.2323  | 0.3547  | 0.2253  |         |
| Flexor tibialis internus      | Fascicle length                       | 3          | 2.7     | 2.6     | 2.5     | 2.4     | 2.2     | 2       |
|                               | Tendon length                         | 0.2        | 0.2     | 0.5     | 0.4     | 0.2     | 0.5     | 0.4     |
|                               | Tendon mass for length=0.2cm          | 0.0018     | 0.0029  | 0.0028  | 0.001   | 0.001   | 0.0013  | 0.0018  |
|                               | Insertion on tibia (cm from knee)     | 0.7        | 0.8     | 0.9     | 0.6     | 0.8     | 0.8     | 0.6     |
|                               | Mass                                  | 0.1191     | 0.1127  | 0.1737  | 0.1533  | 0.0863  | 0.1234  | 0.0742  |
| Flexor tibialis externus      | Fascicle length                       | 3.1        | 3       | 2.9     | 2.7     | 2.5     | 2.6     | 2.3     |
|                               | Insertion on tibia (cm from knee)     | 0.4        | 0.3     | 0.3     | 0.3     | 0.3     | 0.3     | 0.3     |
|                               | Mass                                  | 0.1062     | 0.1399  | 0.2736  | 0.1896  | 0.1065  | 0.1474  | 0.1332  |
| Pubofibularis                 | Fascicle length                       | 2.5        | 2.5     | 2.7     | 2.5     | 2.3     | 2.3     | 2       |
|                               | Insertion on fibula (cm from knee)    | 0.25       | 0.3     | 0.2     | 0.2     | 0.3     | 0.3     | 0.3     |
|                               | MTU length                            | 3.1        | 3.1     | 2.9     | 2.8     | 2.6     | 2.7     | 2.4     |
|                               | Tendon mass for length=0.2cm          | 0.0004     | 0.0004  | 0.0005  | 0.0004  | 0.0006  | 0.0002  | 0.0008  |
|                               | Mass                                  | 0.0668     | 0.0769  | 0.0987  | 0.1021  | 0.0514  | 0.068   | 0.0511  |
| Femorotibialis pars ventralis | Avg fascicle length                   | 1.7        | 1.7     | 1.9     | 2.1     | 1.4     | 1.6     | 1.3     |
|                               | Insertion on tibia (cm from knee)     | 0          | 0       | 0       | 0       | 0       | 0       | 0       |
|                               | Mass                                  | 0.0764     | 0.0741  | 0.1243  | 0.0875  | 0.0844  | 0.1224  | 0.0958  |
| Ambiens pars ventralis        | Fascicle length                       | 2.6        | 2.6     | 2.4     | 2.4     | 2.4     | 2.3     | 1.9     |
|                               | Insertion on tibia (cm from knee)     | 0.25       | 0.2     | 0.3     | 0.2     | 0.2     | 0.2     | 0.2     |
|                               | Mass                                  | 0.1532     | 0.1916  | 0.2912  | 0.2202  | 0.1437  | 0.2102  | 0.1532  |

|                              |                                          |         |         |         |         |         |         |         |
|------------------------------|------------------------------------------|---------|---------|---------|---------|---------|---------|---------|
| Ambiens pars dorsalis        | Fascicle length                          | 2.2     | 2       | 2.5     | 2.3     | 1.4     | 1.8     | 1.4     |
|                              | Insertion on tibia (cm from knee)        | 0.25    | 0.2     | 0.3     | 0.2     | 0.2     | 0.2     | 0.2     |
|                              | Tendon length                            | 0.9     | 1       | 0.8     | 0.7     | 0.6     | 0.7     | 0.7     |
|                              | Tendon mass for length=0.3cm             | 0.009   | 0.0063  | 0.004   | 0.0041  | 0.0029  | 0.003   | 0.0017  |
|                              | Mass                                     | 0.1555  | 0.1522  | 0.223   | 0.1768  | 0.0939  | 0.1643  | 0.1169  |
| Iliofibularis                | Fascicle length                          | 2.9     | 3       | 3.3     | 2.7     | 2.7     | 2.7     | 2.3     |
|                              | Insertion on fibula (cm from knee)       | 0.6-0.8 | 0.7-0.9 | 0.9-1.1 | 0.6-0.8 | 0.5-0.7 | 0.5-0.7 | 0.4-0.6 |
|                              | Mass                                     | 0.1791  | 0.1764  | 0.2788  | 0.223   | 0.1333  | 0.2187  | 0.1536  |
| Ilioischiotibialis           | Fascicle length                          | 2.4     | 2.3     | 2.2     | 2.2     | 2       | 2       | 1.7     |
|                              | Insertion on tibia (cm from knee)        | 0.7     | 0.7     | 0.6     | 0.6     | 0.6     | 0.6     | 0.5     |
|                              | MTU length                               | 2.8     | 2.7     | 2.5     | 2.7     | 2.5     | 2.5     | 2.1     |
|                              | Tendon mass for length=0.2cm             | 0.0007  | 0.0007  | 0.0003  | 0.0004  | 0.0003  | 0.0004  | 0.0002  |
|                              | Mass                                     | 0.1247  | 0.1044  | 0.174   | 0.1645  | 0.0789  | 0.1318  | 0.1056  |
| Femorotibialis pars dorsalis | Fascicle length                          | 1       | 1       | 1.1     | 1.1     | 1.1     | 1.1     | 1.1     |
|                              | Insertion on tibia (cm from knee)        | 0       | 0       | 0       | 0       | 0       | 0       | 0       |
|                              | Pennation angle                          | 28      | 24      | 25      | 20      | 22      | 25      | 25      |
|                              | Mass                                     | 0.1718  | 0.1392  | 0.241   | 0.1301  | 0.1151  | 0.1919  | 0.1427  |
| Adductor femoris             | Fascicle length                          | 1.8     | 1.7     | 1.8     | 1.7     | 1.4     | 1.4     | 1.4     |
|                              | Pennation angle                          | 12      | 12      | 11      | 13      | 14      | 13      | 14      |
|                              | Mass                                     | 0.1949  | 0.2236  | 0.2985  | 0.2688  | 0.1575  | 0.2854  | 0.2046  |
| Ilioischiofibularis          | Fascicle length                          | 1.4     | 1.4     | 1.4     | 1.4     | 1.4     | 1.4     | 1.4     |
|                              | Insertion on fibula (cm from knee)       | 0.4     | 0.4     | 0.4     | 0.4     | 0.4     | 0.4     | 0.4     |
|                              | MTU length                               | 2.2     | 2.2     | 2.2     | 2.4     | 2.2     | 2.1     | 2.2     |
|                              | Tendon mass for length=0.3cm             | 0.0002  | 0.0002  | 0.0004  | 0.0006  | 0.0002  | 0.0005  | 0.0001  |
|                              | Pennation angle                          | 10      | 10      | 10      | 10      | 10      | 10      | 10      |
|                              | Mass                                     | 0.0696  | 0.0472  | 0.0715  | 0.1022  | 0.0457  | 0.0637  | 0.0927  |
| Tibialis anterior            | Fascicle length                          | 1.3     | 1.2     | 1.2     | 1.2     | 1.1     | 1.1     | 1       |
|                              | Insertion on metatarsals (cm from ankle) | 0.1-0.3 | 0.1-0.3 | 0.1-0.3 | 0.1-0.3 | 0.1-0.3 | 0.1-0.3 | 0.1-0.3 |
|                              | Pennation angle                          | 5       | 7       | 9       | 9       | 8       | 9       | 9       |
|                              | Mass                                     | 0.0795  | 0.0876  | 0.098   | 0.0903  | 0.0512  | 0.1091  | 0.0693  |
| Flexor digitorum communis    | Fascicle length                          | 1.3     | 1.4     | 1.3     | 1.2     | 1.1     | 1.1     | 1.1     |
|                              | Insertion on metatarsals (cm from ankle) | 0.2     | 0.2     | 0.2     | 0.2     | 0.2     | 0.2     | 0.2     |
|                              | MTU length                               | 1.5     | 1.6     | 1.5     | 1.5     | 1.5     | 1.7     | 1.5     |
|                              | Tendon mass for length=0.3cm             | 0.0001  | 0.0013  | 0.0019  | 0.002   | 0.0014  | 0.0038  | 0.0008  |
|                              | Mass                                     | 0.0226  | 0.0458  | 0.0544  | 0.0501  | 0.0347  | 0.1415  | 0.0323  |
| Peroneus longus              | Fascicle length                          | 2.1     | 1.9     | 2.1     | 1.8     | 1.7     | 1.6     | 1.6     |
|                              | MTU length                               | 2.9     | 2.9     | 2.9     | 2.7     | 2.6     | 2.7     | 2.4     |
|                              | Insertion on metatarsals (cm)            | 0.3     | 0.3     | 0.4     | 0.4     | 0.4     | 0.3     | 0.2     |

|                                         |                                          |        |        |        |        |        |        |        |
|-----------------------------------------|------------------------------------------|--------|--------|--------|--------|--------|--------|--------|
|                                         | from ankle)                              |        |        |        |        |        |        |        |
|                                         | Tendon mass for length=0.45cm            | 0.0011 | 0.0015 | 0.0015 | 0.0013 | 0.0009 | 0.0005 | 0.0014 |
|                                         | Mass (g)                                 | 0.0462 | 0.0532 | 0.0708 | 0.0435 | 0.0312 | 0.0587 | 0.0494 |
| Peroneus brevis                         | Fascicle length                          | 0.5    | 0.5    | 0.5    | 0.5    | 0.5    | 0.5    | 0.5    |
|                                         | MTU length                               | 2.8    | 2.4    | 2.4    | 2.2    | 1.9    | 2      | 1.9    |
|                                         | Insertion on metatarsals (cm from ankle) | 0.1    | 0.1    | 0.1    | 0.1    | 0.1    | 0.1    | 0.1    |
|                                         | Tendon mass for length=0.3cm             | 0.001  | 0.0016 | 0.002  | 0.0013 | 0.0009 | 0.0005 | 0.0008 |
|                                         | Pennation angle                          | 15     | 17     | 15     | 18     | 13     | 18     | 16     |
|                                         | Mass                                     | 0.0491 | 0.0481 | 0.0746 | 0.0585 | 0.0359 | 0.059  | 0.0465 |
|                                         |                                          |        |        |        |        |        |        |        |
| Extensor digitorum longus               | Fascicle length                          | 2.6    | 2.3    | 2.2    | 2      | 1.9    | 2      | 1.9    |
|                                         | Femoral tendon length                    | 1.2    | 1.4    | 1.2    | 1      | 1      | 1      | 0.9    |
|                                         | Mass femoral tendon for length=0.25cm    | 0.0004 | 0.0003 | 0.0008 | 0.0004 | 0.0004 | 0.0007 | 0.0006 |
|                                         | Origin on femur (cm from knee)           | 0.1    | 0.1    | 0.1    | 0.1    | 0.1    | 0.1    | 0.1    |
|                                         | MTP tendon length                        | 0.9    | 1.2    | 1      | 0.9    | 0.9    | 0.8    | 0.8    |
|                                         | Mass MTP tendon for length=0.3           | 0.0004 | 0.0005 | 0.0008 | 0.0004 | 0.0003 | 0.0004 | 0.0007 |
|                                         | Insertion on metatarsals (cm from ankle) | 0.3    | 0.5    | 0.6    | 0.4    | 0.3    | 0.4    | 0.4    |
|                                         | Mass                                     | 0.0497 | 0.0648 | 0.0781 | 0.0695 | 0.0366 | 0.0704 | 0.0753 |
| Gastrocnemius pars fibularis pars minor | Fascicle length                          | 1.4    | 1.2    | 1.2    | 1.2    | 1      | 1      | 1      |
|                                         | Insertion on metatarsals (cm from ankle) | 0.4    | 0.4    | 0.4    | 0.4    | 0.4    | 0.4    | 0.4    |
|                                         | Origin on femur (cm from knee)           | 0.2    | 0.4    | 0.3    | 0.4    | 0.3    | 0.3    | 0.3    |
|                                         | Pennation angle                          | 14     | 12     | 14     | 14     | 13     | 15     | 13     |
|                                         | MTU length                               | 3.3    | 3.5    | 3.3    | 2.9    | 2.5    | 2.8    | 2.6    |
|                                         | Tendon mass for length=0.3cm             | 0.003  | 0.0027 | 0.0024 | 0.0034 | 0.0022 | 0.001  | 0.0019 |
|                                         | Mass                                     | 0.1282 | 0.1331 | 0.1723 | 0.1729 | 0.0874 | 0.1228 | 0.1067 |
| Gastrocnemius pars fibularis pars major | Fascicle length                          | 2.2    | 2.3    | 2.1    | 2.2    | 2      | 2.2    | 2.1    |
|                                         | Insertion on metatarsals (cm from ankle) | 0.4    | 0.4    | 0.4    | 0.4    | 0.4    | 0.4    | 0.4    |
|                                         | Origin on femur (cm from knee)           | 0.2    | 0.4    | 0.3    | 0.4    | 0.3    | 0.4    | 0.3    |
|                                         | MTU length                               | 3      | 3.2    | 3      | 2.9    | 2.5    | 2.7    | 2.5    |
|                                         | Tendon mass for length=0.3cm             | 0.0044 | 0.0043 | 0.0084 | 0.0057 | 0.0032 | 0.006  | 0.0026 |
|                                         | Mass                                     | 0.1303 | 0.1496 | 0.2877 | 0.2237 | 0.0955 | 0.1784 | 0.1418 |
| Caudofemoralis longus                   | Muscle length                            | 6.2    | 6.5    | 6.8    | 7.1    | 5.7    | 5.8    | 5.5    |
|                                         | Avg fascicle length                      | 1.9    | 2.1    | 2      | 1.9    | 1.8    | 1.8    | 1.8    |
|                                         | MTU length                               | 6.8    | 7.1    | 7.3    | 7.6    | 6.2    | 6.3    | 6      |

|                                      |        |        |        |        |        |        |        |
|--------------------------------------|--------|--------|--------|--------|--------|--------|--------|
| Pennation angle                      | 20     | 17     | 20     | 16     | 15     | 15     | 15     |
| Femoral tendon mass for length=0.5cm | 0.0041 | 0.0055 | 0.0044 | 0.0052 | 0.0031 | 0.0045 | 0.0062 |
| Mass                                 | 0.7325 | 0.8505 | 1.233  | 1.0221 | 0.5983 | 0.7314 | 0.9384 |

SVL, snout-vent length; MTU, muscle-tendon unit; MTP, metatarsalphalangeal; Avg, average.  
All lengths given in cm; all masses given in g.

Table S2. Mean muscle-tendon unit (MTU) length and tendon length change in mm and as a percentage of MTU length for all the hind limb muscles of the femur and crus that have tendons.

| Muscle                                  | Tendon length change (mm) | MTU length (mm) | Tendon length change (% of MTU length) |
|-----------------------------------------|---------------------------|-----------------|----------------------------------------|
| Puboischiotibialis                      | 0.014                     | 36.8            | 0.038                                  |
| Flexor tibialis internus                | 0.008                     | 2.8             | 0.294                                  |
| Pubofibularis                           | 0.026                     | 28              | 0.094                                  |
| Ambiens pars ventralis                  | 0.017                     | 31.4            | 0.053                                  |
| Ambiens pars dorsalis                   | 0.016                     | 27.1            | 0.060                                  |
| Ilioischiotibialis                      | 0.048                     | 25.4            | 0.189                                  |
| Ilioischiofibularis                     | 0.191                     | 22.1            | 0.863                                  |
| Flexor digitorum communis               | 0.018                     | 15.4            | 0.115                                  |
| Peroneus longus                         | 0.051                     | 27.3            | 0.187                                  |
| Peroneus brevis                         | 0.029                     | 22.3            | 0.132                                  |
| Extensor digitorum longus               | 0.076                     | 41.6            | 0.182                                  |
| Gastrocnemius pars fibularis pars minor | 0.038                     | 29.9            | 0.125                                  |
| Gastrocnemius pars fibularis pars major | 0.011                     | 28.3            | 0.037                                  |
| Caudofemoralis longus                   | 0.069                     | 67.6            | 0.103                                  |

Table S3. Loadings from a discriminant function (DF) analysis (Wilks' Lambda  $F=1.87$ ,  $p=0.0466$ ) of hind limb joint angles in *Anolis equestris*. As only DF1 was significant ( $p=0.0466$ ), DF2 ( $p=0.97$ ) is not shown.

| Variable                               | DF1 (94.6%)    |
|----------------------------------------|----------------|
| Femur depression angle (ES)            | <b>0.9431</b>  |
| Max. swing femur depression angle      | <b>0.9417</b>  |
| Mid swing femur depression angle       | <b>0.9311</b>  |
| Femur rotation angle (ES)              | <b>-0.9104</b> |
| Knee angle (FF)                        | <b>-0.9083</b> |
| Max. femur depression angle            | <b>0.8611</b>  |
| t. max. femur rotation angle (% swing) | <b>0.8152</b>  |
| Femur depression angle (MS)            | <b>0.7668</b>  |
| t. min. knee angle (% stance)          | <b>-0.7656</b> |
| Pelvic girdle rotation angle (MS)      | <b>0.4865</b>  |
| Pelvic girdle rotation angle (ES)      | <b>0.3729</b>  |
| Max. swing ankle angle                 | 0.0684         |

Loadings with a magnitude  $\geq 0.3$  are in bold.

Percentage of variation explained by DF1 axis is indicated in parentheses.

FF, footfall; MS, mid stance; ES, end of stance; T, time; Max., maximum; Min., minimum.

Table S4. Loadings from a discriminant function (DF) analysis (Wilks' Lambda  $F=2.04$ ,  $p=0.028$ ) of hind limb angular velocities in *Anolis equestris*. As only DF1 ( $p=0.028$ ) was significant, DF2 ( $p=0.24$ ) is not shown.

| Variable                                       | DF1 (64.3%)    |
|------------------------------------------------|----------------|
| Max. swing knee angle velocity (residuals)     | <b>0.8093</b>  |
| Mid swing knee angle velocity                  | <b>0.8087</b>  |
| Avg. swing femur rotation velocity (residuals) | <b>-0.8081</b> |
| Avg. swing knee angle velocity                 | <b>0.7475</b>  |
| Max. swing ankle angle velocity (residuals)    | <b>0.7429</b>  |
| Avg. stance knee angle velocity                | <b>-0.665</b>  |
| Avg. stance ankle angle velocity (residuals)   | <b>-0.6262</b> |
| Max. stance femur depression velocity          | 0.1951         |
| Femur depression velocity (MS)                 | 0.1631         |
| Min. swing femur depression velocity           | -0.1519        |
| Avg. stance femur depression velocity          | -0.1331        |
| Min. swing ankle angle velocity (residuals)    | 0.1128         |

Loadings with a magnitude  $\geq 0.3$  are in bold.  
 Percentage of variation explained by DF1 axis is indicated in parentheses.  
 Variables that were loaded as residuals because they regressed significantly with body speed are indicated in parentheses.  
 MS, mid stance; Max., maximum; Min., minimum; Avg., average.

Table S5. Hind limb joint angle and angular velocity variables that loaded heavily ( $\geq 0.3$ ) on the first axis of discriminant function analyses (Fig. 3, Tables 3,4).

|                                        | Perch Diameter      |                     |
|----------------------------------------|---------------------|---------------------|
|                                        | Narrow              | Broad               |
| <b>Joint Angle</b>                     |                     |                     |
| Femur depression angle (ES)            | 38.43 $\pm$ 2.30    | 9.49 $\pm$ 1.68     |
| Max. swing femur depression angle      | 40.23 $\pm$ 2.45    | 9.42 $\pm$ 1.83     |
| Mid swing femur depression angle       | 33.53 $\pm$ 2.75    | -3.92 $\pm$ 2.33    |
| Femur rotation angle (ES)              | 50.50 $\pm$ 2.38    | 76.24 $\pm$ 1.39    |
| Knee angle (FF)                        | 48.36 $\pm$ 3.23    | 88.77 $\pm$ 2.09    |
| Max. femur depression angle            | 42.85 $\pm$ 2.28    | 19.73 $\pm$ 2.50    |
| t. max. femur rotation angle (% swing) | 45.03 $\pm$ 5.19    | 9.88 $\pm$ 2.17     |
| Femur depression angle (MS)            | 35.68 $\pm$ 2.83    | 11.50 $\pm$ 2.85    |
| t. min. knee angle (% stance)          | 9.77 $\pm$ 2.85     | 42.28 $\pm$ 4.75    |
| Pelvic girdle rotation angle (MS)      | -2.67 $\pm$ 1.83    | -12.72 $\pm$ 2.94   |
| Pelvic girdle rotation angle (ES)      | -0.67 $\pm$ 2.62    | -8.57 $\pm$ 2.78    |
| <b>Joint angular velocity</b>          |                     |                     |
| Max. swing knee angle velocity         | 308.01 $\pm$ 75.08  | 955.63 $\pm$ 140.35 |
| Mid swing knee angle velocity          | -480.66 $\pm$ 76.01 | 247.44 $\pm$ 115.90 |
| Avg. swing femur rotation velocity     | -45.80 $\pm$ 19.34  | -180.21 $\pm$ 20.58 |
| Avg. swing knee angle velocity         | -422.71 $\pm$ 66.36 | 17.11 $\pm$ 47.26   |
| Max. swing ankle angle velocity        | 276.54 $\pm$ 84.58  | 892.83 $\pm$ 127.37 |
| Avg. stance knee angle velocity        | 217.19 $\pm$ 37.67  | 11.00 $\pm$ 26.16   |
| Avg. stance ankle angle velocity       | 247.13 $\pm$ 46.68  | 96.46 $\pm$ 28.11   |

FF, footfall; MS, mid stance; ES, end of stance; t., time; Max., maximum; Min., minimum; Avg., average.

Velocities are in degrees  $s^{-1}$ ; values are means  $\pm$  s.e.m.
